# Supplementary material
Source: PubMed Central journal article supplement (PMC2633798)
Supplement: cib0101_0047SD1.pdf [file cib0101_0047SD1.pdf]

## Article Addendum

# The functional domain grouping of microtubule associated proteins

---

Katherine H. Fisher,<sup>1-3,\*</sup> Charlotte M. Deane<sup>2,4</sup> and James G. Wakefield<sup>1,3</sup>

<sup>1</sup>Department of Zoology; <sup>2</sup>Department of Statistics; <sup>3</sup>Life Sciences Interface; and <sup>4</sup>Systems Biology Doctoral Training Centres; University of Oxford; Oxford United Kingdom

**Abbreviations:** GO, gene ontology; MT, microtubule; MAP, microtubule associated protein; RfC, replication factor C

**Key words:** *Drosophila*, domain, microtubule, MAP, alignment

---

## Supplementary Material

\*Correspondence to: Katherine H. Fisher; Departments of Zoology and Statistics; University of Oxford; Oxford OX1 3PS United Kingdom; Email: katherine.fisher@wadh.ox.ac.uk

Submitted: 08/06/08; Accepted: 08/12/08

Previously published online as a *Communicative & Integrative Biology* E-publication: <http://www.landesbioscience.com/journals/cib/article/6795>

Addendum to: Hughes JR, Meireles AM, Fisher KH, Garcia A, Antrobus PR, Wainman A, Zitzmann N, Deane C, Ohkura H, Wakefield JG. A microtubule interactome: Complexes with roles in cell cycle and mitosis. *PLoS Biol* 2008; 6:98.

**Supplementary Table 1: All aligned MAPs with domains indicated in FlyBase.** All of the proteins shown in Figure 1 are listed here with all of their functional domains. InterPro codes for these domains are indicated for ease of reference.

|                                |                           |           |                                                           |
|--------------------------------|---------------------------|-----------|-----------------------------------------------------------|
| ACTIN (IPR004001)              |                           |           |                                                           |
| CG4027                         | Actin 5C                  | IPR004000 | Actin/actin-like                                          |
|                                |                           | IPR004001 | Actin, conserved site                                     |
| CG12051                        | Actin 42A                 | IPR004000 | Actin/actin-like                                          |
|                                |                           | IPR004001 | Actin, conserved site                                     |
| CG6174                         | Actin-related protein 87C | IPR004001 | Actin, conserved site                                     |
| CG10067                        | Actin 57A                 | IPR004000 | Actin/actin-like                                          |
|                                |                           | IPR004001 | Actin, conserved site                                     |
| DYNEIN HEAVY CHAIN (IPR004273) |                           |           |                                                           |
| CG7507                         | Dynein heavy chain 64C    | IPR000169 | Peptidase, cysteine peptidase active site                 |
|                                |                           | IPR003593 | AAA+ ATPase, core                                         |
|                                |                           | IPR004273 | Dynein heavy chain                                        |
|                                |                           | IPR011704 | ATPase associated with various cellular activities, AAA-5 |
|                                |                           | IPR013594 | Dynein heavy chain, N-terminal region 1                   |
|                                |                           | IPR013602 | Dynein heavy chain, N-terminal region 2                   |
| CG9492                         |                           | IPR000169 | Peptidase, cysteine peptidase active site                 |
|                                |                           | IPR004273 | Dynein heavy chain                                        |
|                                |                           | IPR011704 | ATPase associated with various cellular activities, AAA-5 |
|                                |                           | IPR013594 | Dynein heavy chain, N-terminal region 1                   |
|                                |                           | IPR013602 | Dynein heavy chain, N-terminal region 2                   |
|                                |                           | IPR003593 | AAA+ ATPase, core                                         |
| CG3339                         |                           | IPR000169 | Peptidase, cysteine peptidase active site                 |
|                                |                           | IPR000276 | GPCR, rhodopsin-like                                      |
|                                |                           | IPR004273 | Dynein heavy chain                                        |
|                                |                           | IPR011704 | ATPase associated with various cellular activities, AAA-5 |

|                                |                                                                           |           |                                                                 |
|--------------------------------|---------------------------------------------------------------------------|-----------|-----------------------------------------------------------------|
|                                |                                                                           | IPR013594 | Dynein heavy chain, N-terminal region 1                         |
|                                |                                                                           | IPR013602 | Dynein heavy chain, N-terminal region 2                         |
| KINESIN (IPR001752, IPR010544) |                                                                           |           |                                                                 |
| CG8590                         | Klp3A                                                                     | IPR001752 | Kinesin, motor region                                           |
| CG10923                        | Klp67A                                                                    | IPR001752 | Kinesin, motor region                                           |
| CG9191                         | Klp61F                                                                    | IPR001752 | Kinesin, motor region                                           |
| CG1453                         | Klp10A                                                                    | IPR001752 | Kinesin, motor region                                           |
| CG7765                         | Kinesin heavy chain                                                       | IPR001752 | Kinesin, motor region                                           |
| CG12298                        | subito / KIF20A                                                           | IPR001752 | Kinesin, motor region                                           |
| CG6392                         | CENP-meta*<br>(not all domains shown here)                                | IPR001752 | Kinesin, motor region                                           |
|                                |                                                                           | IPR002017 | Spectrin repeat                                                 |
| CG5020                         | CLIP-190*<br>(not all domains shown here)                                 | IPR000938 | Cytoskeleton-associated, CAP-Gly                                |
|                                |                                                                           | IPR010544 | Kinesin-related                                                 |
| KINASE (IPR000719)             |                                                                           |           |                                                                 |
| CG18255                        | Stretchin / myosin light chain kinase**<br>(also in Immunoglobulin group) | IPR000719 | Protein kinase, core                                            |
|                                |                                                                           | IPR002290 | Serine/threonine protein kinase                                 |
|                                |                                                                           | IPR003006 | Immunoglobulin/major histocompatibility complex, conserved site |
|                                |                                                                           | IPR003598 | Immunoglobulin subtype 2                                        |
|                                |                                                                           | IPR003599 | Immunoglobulin subtype                                          |
|                                |                                                                           | IPR003961 | Fibronectin, type III                                           |
|                                |                                                                           | IPR003962 | Fibronectin, type III subdomain                                 |
|                                |                                                                           | IPR007110 | Immunoglobulin-like                                             |
|                                |                                                                           | IPR008271 | Serine/threonine protein kinase, active site                    |
|                                |                                                                           | IPR008957 | Fibronectin, type III-like fold                                 |

|         |                     |           |                                                                |
|---------|---------------------|-----------|----------------------------------------------------------------|
|         |                     | IPR009134 | Vascular endothelial growth factor receptor, VEGFR, N-terminal |
|         |                     | IPR011009 | Protein kinase-like                                            |
|         |                     | IPR013098 | Immunoglobulin I-set                                           |
|         |                     | IPR013151 | Immunoglobulin                                                 |
|         |                     | IPR013783 | Immunoglobulin-like fold                                       |
|         |                     | IPR017441 | Protein kinase ATP binding, conserved site                     |
|         |                     | IPR017442 | Serine/threonine protein kinase-related                        |
| CG33553 | Darkener of Apricot | IPR000719 | Protein kinase, core                                           |
|         |                     | IPR002290 | Serine/threonine protein kinase                                |
|         |                     | IPR008271 | Serine/threonine protein kinase, active site                   |
|         |                     | IPR011009 | Protein kinase-like                                            |
|         |                     | IPR017441 | Protein kinase ATP binding, conserved site                     |
|         |                     | IPR017442 | Serine/threonine protein kinase-related                        |
| CG4488  | Wee 1               | IPR000719 | Protein kinase, core                                           |
|         |                     | IPR008271 | Serine/threonine protein kinase, active site                   |
|         |                     | IPR011009 | Protein kinase-like                                            |
|         |                     | IPR017164 | Wee1-like protein kinase                                       |
|         |                     | IPR017441 | Protein kinase ATP binding, conserved site                     |
|         |                     | IPR017442 | Serine/threonine protein kinase-related                        |
| CG5363  | cdc2                | IPR000719 | Protein kinase, core                                           |
|         |                     | IPR002290 | Serine/threonine protein kinase                                |
|         |                     | IPR008271 | Serine/threonine protein kinase, active site                   |
|         |                     | IPR011009 | Protein kinase-like                                            |
|         |                     | IPR017441 | Protein kinase ATP binding, conserved site                     |
|         |                     | IPR017442 | Serine/threonine protein kinase-related                        |
| CG10498 | cdc2c               | IPR000719 | Protein kinase, core                                           |
|         |                     | IPR002290 | Serine/threonine protein kinase                                |
|         |                     | IPR008271 | Serine/threonine protein kinase, active site                   |
|         |                     | IPR011009 | Protein kinase-like                                            |

|                           |          |           |                                            |
|---------------------------|----------|-----------|--------------------------------------------|
|                           |          | IPR017441 | Protein kinase ATP binding, conserved site |
|                           |          | IPR017442 | Serine/threonine protein kinase-related    |
| SEPTIN (IPR016491)        |          |           |                                            |
| CG1403                    | Septin 1 | IPR000038 | Cell division/GTP binding protein          |
|                           |          | IPR000038 | Cell division/GTP binding protein          |
|                           |          | IPR008113 | Septin 2                                   |
|                           |          | IPR016491 | Septin                                     |
| CG4173                    | Septin 2 | IPR000038 | Cell division/GTP binding protein          |
|                           |          | IPR016491 | Septin                                     |
| CG8705                    | Peanut   | IPR000038 | Cell division/GTP binding protein          |
|                           |          | IPR016491 | Septin                                     |
| CG2916                    | Septin 5 | IPR000038 | Cell division/GTP binding protein          |
|                           |          | IPR000923 | Blue (type 1) copper domain                |
|                           |          | IPR016491 | Septin                                     |
| EB1 (IPR004953)           |          |           |                                            |
| CG18190                   |          | IPR001715 | Calponin-like actin-binding                |
|                           |          | IPR004953 | EB1, C-terminal                            |
|                           |          | IPR016146 | Calponin homology                          |
| CG3265                    | EB1      | IPR001715 | Calponin-like actin-binding                |
|                           |          | IPR004953 | EB1, C-terminal                            |
|                           |          | IPR016146 | Calponin homology                          |
| G-BETA REPEAT (IPR001680) |          |           |                                            |
| CG10132                   |          | IPR001680 | WD40 repeat                                |
|                           |          | IPR007111 | NACHT nucleoside triphosphatase            |
|                           |          | IPR011046 | WD40 repeat-like                           |
|                           |          | IPR015943 | WD40/YVTN repeat-like                      |

|         |                                        |           |                                                  |
|---------|----------------------------------------|-----------|--------------------------------------------------|
| CG10545 | Gbeta13F                               | IPR015943 | WD40/YVTN repeat-like                            |
|         |                                        | IPR001632 | G-protein, beta subunit                          |
|         |                                        | IPR001680 | WD40 repeat                                      |
|         |                                        | IPR011046 | WD40 repeat-like                                 |
|         |                                        | IPR016346 | Guanine nucleotide-binding protein, beta subunit |
| CG7581  | Bub3                                   | IPR015943 | WD40/YVTN repeat-like                            |
|         |                                        | IPR001680 | WD40 repeat                                      |
|         |                                        | IPR011046 | WD40 repeat-like                                 |
| CG5519  | Gbp                                    | IPR015943 | WD40/YVTN repeat-like                            |
|         |                                        | IPR001680 | WD40 repeat                                      |
|         |                                        | IPR003613 | U box                                            |
|         |                                        | IPR011046 | WD40 repeat-like                                 |
|         |                                        | IPR013083 | Zinc finger, RING/FYVE/PHD-type                  |
| CG7111  | RACK 1                                 | IPR015943 | WD40/YVTN repeat-like                            |
|         |                                        | IPR001680 | WD40 repeat                                      |
|         |                                        | IPR011046 | WD40 repeat-like                                 |
| CG9945  |                                        | IPR001680 | WD40 repeat                                      |
|         |                                        | IPR011046 | WD40 repeat-like                                 |
|         |                                        | IPR015943 | WD40/YVTN repeat-like                            |
|         |                                        | IPR017399 | WD repeat protein 23                             |
| CG18000 | Dynein intermediate chain (short wing) | IPR015943 | WD40/YVTN repeat-like                            |
|         |                                        | IPR001680 | WD40 repeat                                      |
|         |                                        | IPR011046 | WD40 repeat-like                                 |
| CG8882  | eIF3-S2 / Trip1                        | IPR015943 | WD40/YVTN repeat-like                            |
|         |                                        | IPR001680 | WD40 repeat                                      |

|                                       |                                 |           |                                                            |
|---------------------------------------|---------------------------------|-----------|------------------------------------------------------------|
|                                       |                                 | IPR011046 | WD40 repeat-like                                           |
| CG3957                                | Wing Morphogenesis Defect (WMD) | IPR001680 | WD40 repeat                                                |
|                                       |                                 | IPR015943 | WD40/YVTN repeat-like                                      |
|                                       |                                 | IPR011046 | WD40 repeat-like                                           |
| CG17437                               | will die slowly                 | IPR015943 | WD40/YVTN repeat-like                                      |
|                                       |                                 | IPR001632 | G-protein, beta subunit                                    |
|                                       |                                 | IPR001680 | WD40 repeat                                                |
|                                       |                                 | IPR011046 | WD40 repeat-like                                           |
| CG9615                                | tex                             | IPR015943 | WD40/YVTN repeat-like                                      |
|                                       |                                 | IPR001680 | WD40 repeat                                                |
|                                       |                                 | IPR011046 | WD40 repeat-like                                           |
|                                       |                                 | IPR011659 | WD40-like Beta Propeller                                   |
| CG6235                                | twins/aar                       | IPR015943 | WD40/YVTN repeat-like                                      |
|                                       |                                 | IPR000009 | Protein phosphatase 2A, regulatory subunit PR55            |
|                                       |                                 | IPR001680 | WD40 repeat                                                |
|                                       |                                 | IPR011046 | WD40 repeat-like                                           |
| GLUTATHIONE S-TRANSFERASE (IPR004046) |                                 |           |                                                            |
| CG11901                               | eEF1gamma                       | IPR001662 | Translation elongation factor EF1B, gamma chain, conserved |
|                                       |                                 | IPR004045 | Glutathione S-transferase, N-terminal                      |
|                                       |                                 | IPR004046 | Glutathione S-transferase, C-terminal                      |
|                                       |                                 | IPR010987 | Glutathione S-transferase, C-terminal-like                 |
|                                       |                                 | IPR012335 | Thioredoxin fold                                           |
|                                       |                                 | IPR012336 | Thioredoxin-like fold                                      |
| CG30185                               |                                 | IPR004046 | Glutathione S-transferase, C-terminal                      |
|                                       |                                 | IPR010987 | Glutathione S-transferase, C-terminal-like                 |
| SHORT CHAIN DEHYDROGENASE (IPR002198) |                                 |           |                                                            |

|                                    |                       |           |                                                                         |
|------------------------------------|-----------------------|-----------|-------------------------------------------------------------------------|
| CG3481                             | Alcohol Dehydrogenase | IPR000897 | Signal recognition particle, SRP54 subunit, GTPase                      |
|                                    |                       | IPR002198 | Short-chain dehydrogenase/reductase SDR                                 |
|                                    |                       | IPR002424 | Insect alcohol dehydrogenase family                                     |
|                                    |                       | IPR002425 | Insect alcohol dehydrogenase                                            |
|                                    |                       | IPR016040 | NAD(P)-binding                                                          |
| CG7113                             | scully                | IPR002198 | Short-chain dehydrogenase/reductase SDR                                 |
|                                    |                       | IPR002347 | Glucose/ribitol dehydrogenase                                           |
|                                    |                       | IPR016040 | NAD(P)-binding                                                          |
| CG5590                             |                       | IPR002198 | Short-chain dehydrogenase/reductase SDR                                 |
|                                    |                       | IPR002347 | Glucose/ribitol dehydrogenase                                           |
|                                    |                       | IPR003033 | Sterol-binding                                                          |
|                                    |                       | IPR016040 | NAD(P)-binding                                                          |
|                                    |                       | IPR016083 | Sterol-binding-like                                                     |
| TRANSKETOLASE (IPR005475)          |                       |           |                                                                         |
| CG11876                            |                       | IPR002197 | Helix-turn-helix, Fis-type                                              |
|                                    |                       | IPR005475 | Transketolase, central region                                           |
|                                    |                       | IPR005476 | Transketolase, C-terminal                                               |
|                                    |                       |           | Transketolase, C-terminal/Pyruvate-ferredoxin oxidoreductase, domain II |
|                                    |                       | IPR009014 | domain II                                                               |
|                                    |                       | IPR013177 | Protein of Unknown function DUF1713, mitochondria                       |
|                                    |                       | IPR015941 | Transketolase C-terminal-like                                           |
| CG8036                             |                       | IPR005474 | Transketolase, N-terminal                                               |
|                                    |                       | IPR005475 | Transketolase, central region                                           |
|                                    |                       | IPR005476 | Transketolase, C-terminal                                               |
|                                    |                       |           | Transketolase, C-terminal/Pyruvate-ferredoxin oxidoreductase, domain II |
|                                    |                       | IPR009014 | domain II                                                               |
|                                    |                       | IPR015941 | Transketolase C-terminal-like                                           |
| ACYL-COA DEHYDROGENASE (IPR006090) |                       |           |                                                                         |
| CG7461                             |                       | IPR006089 | Acyl-CoA dehydrogenase, conserved site                                  |



|                                                 |           |                                                            |
|-------------------------------------------------|-----------|------------------------------------------------------------|
|                                                 | IPR006090 | Acyl-CoA oxidase/dehydrogenase, type 1                     |
|                                                 | IPR006091 | Acyl-CoA dehydrogenase/oxidase, central region             |
|                                                 | IPR006092 | Acyl-CoA dehydrogenase, N-terminal                         |
|                                                 | IPR009075 | Acyl-CoA dehydrogenase/oxidase C-terminal                  |
|                                                 | IPR009100 | Acyl-CoA dehydrogenase/oxidase, middle and N-terminal      |
|                                                 | IPR013764 | Acyl-CoA oxidase/dehydrogenase, type1/2, C-terminal        |
|                                                 | IPR013786 | Acyl-CoA dehydrogenase/oxidase, N-terminal                 |
| CG9547                                          | IPR006090 | Acyl-CoA oxidase/dehydrogenase, type 1                     |
|                                                 | IPR006091 | Acyl-CoA dehydrogenase/oxidase, central region             |
|                                                 | IPR006092 | Acyl-CoA dehydrogenase, N-terminal                         |
|                                                 | IPR009075 | Acyl-CoA dehydrogenase/oxidase C-terminal                  |
|                                                 | IPR009100 | Acyl-CoA dehydrogenase/oxidase, middle and N-terminal      |
|                                                 | IPR013764 | Acyl-CoA oxidase/dehydrogenase, type1/2, C-terminal        |
|                                                 | IPR013786 | Acyl-CoA dehydrogenase/oxidase, N-terminal                 |
| CG12262                                         | IPR006089 | Acyl-CoA dehydrogenase, conserved site                     |
|                                                 | IPR006090 | Acyl-CoA oxidase/dehydrogenase, type 1                     |
|                                                 | IPR006091 | Acyl-CoA dehydrogenase/oxidase, central region             |
|                                                 | IPR006092 | Acyl-CoA dehydrogenase, N-terminal                         |
|                                                 | IPR009075 | Acyl-CoA dehydrogenase/oxidase C-terminal                  |
|                                                 | IPR009100 | Acyl-CoA dehydrogenase/oxidase, middle and N-terminal      |
|                                                 | IPR013764 | Acyl-CoA oxidase/dehydrogenase, type1/2, C-terminal        |
|                                                 | IPR013786 | Acyl-CoA dehydrogenase/oxidase, N-terminal                 |
| ECH – ENOYL-COA HYDRATASE/ISOMERASE (IPR001753) |           |                                                            |
| CG4389                                          | IPR001753 | Crotonase, core                                            |
|                                                 | IPR006108 | 3-hydroxyacyl-CoA dehydrogenase, C-terminal                |
|                                                 | IPR006176 | 3-hydroxyacyl-CoA dehydrogenase, NAD binding               |
|                                                 | IPR008927 | 6-phosphogluconate dehydrogenase, C-terminal-like          |
|                                                 | IPR012803 | Fatty acid oxidation complex, alpha subunit, mitochondrial |
|                                                 | IPR013328 | Dehydrogenase, multihelical                                |
|                                                 | IPR016040 | NAD(P)-binding                                             |

|                                           |                                  |           |                                                       |
|-------------------------------------------|----------------------------------|-----------|-------------------------------------------------------|
| CG6543                                    |                                  | IPR001753 | Crotonase, core                                       |
| CG8778                                    |                                  | IPR001753 | Crotonase, core                                       |
| HSP20/ALPHA/CRYSTALLIN FAMILY (IPR002068) |                                  |           |                                                       |
| CG4463                                    | Hsp-23                           | IPR001436 | Alpha crystallin/Heat shock protein                   |
|                                           |                                  | IPR002068 | Heat shock protein Hsp20                              |
|                                           |                                  | IPR008978 | Hsp20-like chaperone                                  |
|                                           |                                  | IPR010916 | TonB box, conserved site                              |
| CG4183                                    | Hsp-26                           | IPR001436 | Alpha crystallin/Heat shock protein                   |
|                                           |                                  | IPR002068 | Heat shock protein Hsp20                              |
|                                           |                                  | IPR008978 | Hsp20-like chaperone                                  |
|                                           |                                  | IPR010916 | TonB box, conserved site                              |
| CG4466                                    | Hsp-27                           | IPR001436 | Alpha crystallin/Heat shock protein                   |
|                                           |                                  | IPR002068 | Heat shock protein Hsp20                              |
|                                           |                                  | IPR008978 | Hsp20-like chaperone                                  |
|                                           |                                  | IPR010916 | TonB box, conserved site                              |
| PEPTIDASE/INSULASE FAMILY (IPR011765)     |                                  |           |                                                       |
| CG4169                                    | Ubiquinol-Cytochrome c Reductase | IPR007863 | Peptidase M16, C-terminal                             |
|                                           |                                  | IPR011765 | Peptidase M16, N-terminal                             |
|                                           |                                  | IPR011237 | Peptidase M16, core                                   |
|                                           |                                  | IPR011249 | Metalloenzyme, LuxS/M16 peptidase-like, metal-binding |
| CG3731                                    |                                  | IPR001431 | Peptidase M16, zinc-binding site                      |
|                                           |                                  | IPR007863 | Peptidase M16, C-terminal                             |
|                                           |                                  | IPR011765 | Peptidase M16, N-terminal                             |
|                                           |                                  | IPR011237 | Peptidase M16, core                                   |
|                                           |                                  | IPR011249 | Metalloenzyme, LuxS/M16 peptidase-like, metal-binding |

|                                      |                        |           |                                                            |
|--------------------------------------|------------------------|-----------|------------------------------------------------------------|
| RNA RECOGNITION MOTIF (IPR000504)    |                        |           |                                                            |
| CG12357                              | Cap Binding Protein 20 | IPR000504 | RNA recognition motif, RNP-1                               |
|                                      |                        | IPR012677 | Nucleotide-binding, alpha-beta plait                       |
| CG5119 PAbp                          |                        | IPR000504 | RNA recognition motif, RNP-1                               |
|                                      |                        | IPR002004 | Polyadenylate-binding protein/Hyperplastic disc protein    |
|                                      |                        | IPR006515 | Polyadenylate binding protein, human types 1, 2, 3, 4      |
|                                      |                        | IPR012677 | Nucleotide-binding, alpha-beta plait                       |
| TETRATRICOPEPTIDE REPEAT (IPR001440) |                        |           |                                                            |
| CG3678                               |                        | IPR001440 | Tetratricopeptide TRP-1                                    |
|                                      |                        | IPR011990 | Tetratricopeptide-like helical                             |
|                                      |                        | IPR013026 | Tetratricopeptide region                                   |
| CG17556                              |                        | IPR001440 | Tetratricopeptide TRP-1                                    |
|                                      |                        | IPR011990 | Tetratricopeptide-like helical                             |
|                                      |                        | IPR013026 | Tetratricopeptide region                                   |
| LIPASE (IPR000734)                   |                        |           |                                                            |
| CG2985                               | Yolk protein 1         | IPR000734 | Lipase                                                     |
|                                      |                        | IPR000734 | Lipase                                                     |
|                                      |                        | IPR013818 | Lipase, N-terminal                                         |
| CG2979 Yolk protein 2                |                        | IPR000734 | Lipase                                                     |
|                                      |                        | IPR013818 | Lipase, N-terminal                                         |
| CG11129 Yolk protein 3               |                        | IPR000734 | Lipase                                                     |
|                                      |                        | IPR005479 | Carbamoyl phosphate synthetase, large subunit, ATP-binding |
|                                      |                        | IPR013818 | Lipase, N-terminal                                         |
| UBIQUITIN (IPR000626)                |                        |           |                                                            |
| CG32744                              | Ubi-p5E                | IPR000626 | Ubiquitin                                                  |

|                                 |                |           |                                                       |
|---------------------------------|----------------|-----------|-------------------------------------------------------|
| CG11624                         | Ubi-p63E       | IPR000626 | Ubiquitin                                             |
| AAA ATPASE (IPR003959)          |                |           |                                                       |
| CG2331                          | TER94          | IPR001984 | Peptidase S16, Lon protease                           |
|                                 |                | IPR003338 | AAA ATPase VAT, N-terminal                            |
|                                 |                | IPR003593 | AAA+ ATPase, core                                     |
|                                 |                | IPR003959 | AAA ATPase, core                                      |
|                                 |                | IPR003960 | AAA ATPase, conserved site                            |
|                                 |                | IPR005938 | AAA ATPase, CDC48                                     |
|                                 |                | IPR009010 | Aspartate decarboxylase-like fold                     |
|                                 |                | IPR015415 | Vps4 oligomerisation, C-terminal                      |
| CG3455                          | Rpt4b          | IPR003593 | AAA+ ATPase, core                                     |
|                                 |                | IPR003959 | AAA ATPase, core                                      |
|                                 |                | IPR003960 | AAA ATPase, conserved site                            |
|                                 |                | IPR005937 | 26S proteasome subunit P45                            |
| CG2241                          | Rpt6b          | IPR003593 | AAA+ ATPase, core                                     |
|                                 |                | IPR003959 | AAA ATPase, core                                      |
|                                 |                | IPR003960 | AAA ATPase, conserved site                            |
|                                 |                | IPR005937 | 26S proteasome subunit P45                            |
| CG1489                          | Pros-45 / Rpt6 | IPR003593 | AAA+ ATPase, core                                     |
|                                 |                | IPR003959 | AAA ATPase, core                                      |
|                                 |                | IPR003960 | AAA ATPase, conserved site                            |
|                                 |                | IPR005937 | 26S proteasome subunit P45                            |
| HELICASE (IPR011545, IPR001650) |                |           |                                                       |
| CG10077                         |                | IPR000629 | RNA helicase, ATP-dependent, DEAD-box, conserved site |
|                                 |                | IPR001650 | DNA/RNA helicase, C-terminal                          |
|                                 |                | IPR011545 | DNA/RNA helicase, DEAD/DEAH box type, N-terminal      |
|                                 |                | IPR014001 | DEAD-like helicase, N-terminal                        |

|         |                            |           |                                                       |
|---------|----------------------------|-----------|-------------------------------------------------------|
|         |                            | IPR014014 | RNA helicase, DEAD-box type, Q motif                  |
|         |                            | IPR014021 | Helicase, superfamily 1 and 2, ATP-binding            |
| CG10279 | Rm62                       | IPR000629 | RNA helicase, ATP-dependent, DEAD-box, conserved site |
|         |                            | IPR001650 | DNA/RNA helicase, C-terminal                          |
|         |                            | IPR011545 | DNA/RNA helicase, DEAD/DEAH box type, N-terminal      |
|         |                            | IPR014001 | DEAD-like helicase, N-terminal                        |
|         |                            | IPR014014 | RNA helicase, DEAD-box type, Q motif                  |
|         |                            | IPR014021 | Helicase, superfamily 1 and 2, ATP-binding            |
| CG7269  | Hel25E                     | IPR001650 | DNA/RNA helicase, C-terminal                          |
|         |                            | IPR011545 | DNA/RNA helicase, DEAD/DEAH box type, N-terminal      |
|         |                            | IPR014001 | DEAD-like helicase, N-terminal                        |
|         |                            | IPR014014 | RNA helicase, DEAD-box type, Q motif                  |
|         |                            | IPR014021 | Helicase, superfamily 1 and 2, ATP-binding            |
| CG9075  | eIF4A                      | IPR000629 | RNA helicase, ATP-dependent, DEAD-box, conserved site |
|         |                            | IPR001650 | DNA/RNA helicase, C-terminal                          |
|         |                            | IPR011545 | DNA/RNA helicase, DEAD/DEAH box type, N-terminal      |
|         |                            | IPR014001 | DEAD-like helicase, N-terminal                        |
|         |                            | IPR014014 | RNA helicase, DEAD-box type, Q motif                  |
|         |                            | IPR014021 | Helicase, superfamily 1 and 2, ATP-binding            |
| CG4916  | Maternal Expression at 31B | IPR000629 | RNA helicase, ATP-dependent, DEAD-box, conserved site |
|         |                            | IPR001650 | DNA/RNA helicase, C-terminal                          |
|         |                            | IPR011545 | DNA/RNA helicase, DEAD/DEAH box type, N-terminal      |
|         |                            | IPR014001 | DEAD-like helicase, N-terminal                        |
|         |                            | IPR014014 | RNA helicase, DEAD-box type, Q motif                  |
|         |                            | IPR014021 | Helicase, superfamily 1 and 2, ATP-binding            |
| HSP70   |                            |           |                                                       |
| CG31366 | Hsp-70Aa                   | IPR001023 | Heat shock protein Hsp70                              |
|         |                            | IPR013126 | Heat shock protein 70                                 |

|                   |                                           |                                     |                                                                                                                          |
|-------------------|-------------------------------------------|-------------------------------------|--------------------------------------------------------------------------------------------------------------------------|
| CG18743           | Hsp-70Ab                                  | IPR001023<br>IPR013126              | Heat shock protein Hsp70<br>Heat shock protein 70                                                                        |
| CG31449           | Hsp-70Ba                                  | IPR001023<br>IPR013126              | Heat shock protein Hsp70<br>Heat shock protein 70                                                                        |
| CG5834            | Hsp70Bbb                                  | IPR001023<br>IPR013126              | Heat shock protein Hsp70<br>Heat shock protein 70                                                                        |
| CG4147/<br>CG1579 | Hsp-c3                                    | IPR000886<br>IPR001023<br>IPR013126 | Endoplasmic reticulum, targeting sequence<br>Heat shock protein Hsp70<br>Heat shock protein 70                           |
| CG8542            | Hsp-c5                                    | IPR001023<br>IPR012725<br>IPR013126 | Heat shock protein Hsp70<br>Chaperone DnaK<br>Heat shock protein 70                                                      |
| CG4264            | Hsp-c4                                    | IPR001023<br>IPR013126              | Heat shock protein Hsp70<br>Heat shock protein 70                                                                        |
| CG8937            | Hsp-c1                                    | IPR001023<br>IPR013126              | Heat shock protein Hsp70<br>Heat shock protein 70                                                                        |
| CG5436            | Hsp-68                                    | IPR001023<br>IPR013126              | Heat shock protein Hsp70<br>Heat shock protein 70                                                                        |
| CG1519            | PROTEOSOME 20S (IPR001353)<br>Pros-alpha7 | IPR000426<br>IPR000426<br>IPR001353 | Proteasome alpha-subunit, conserved site<br>Proteasome alpha-subunit, conserved site<br>20S proteasome, A and B subunits |
| CG4904            | Pros 35                                   | IPR000426                           | Proteasome alpha-subunit, conserved site                                                                                 |

|                                    |                |           |                                                       |
|------------------------------------|----------------|-----------|-------------------------------------------------------|
|                                    |                | IPR001353 | 20S proteasome, A and B subunits                      |
| CG9327                             | Pros 29        | IPR000243 | Peptidase T1A, proteasome beta-subunit                |
|                                    |                | IPR000426 | Proteasome alpha-subunit, conserved site              |
|                                    |                | IPR001353 | 20S proteasome, A and B subunits                      |
|                                    |                | IPR016050 | Proteasome, beta-type subunit, conserved site         |
| T-COMPLEX CHAPERONE<br>(IPR002423) |                |           |                                                       |
| CG5374                             | Tcp1-alpha     | IPR001844 | Chaperonin Cpn60                                      |
|                                    |                | IPR002194 | Chaperonin TCP-1, conserved site                      |
|                                    |                | IPR002423 | Chaperonin Cpn60/TCP-1                                |
|                                    |                | IPR008950 | GroEL-like chaperone, ATPase                          |
|                                    |                | IPR012715 | T-complex protein 1, alpha subunit                    |
| CG7033                             | Tcp1-beta      | IPR000629 | RNA helicase, ATP-dependent, DEAD-box, conserved site |
|                                    |                | IPR000629 | RNA helicase, ATP-dependent, DEAD-box, conserved site |
|                                    |                | IPR001844 | Chaperonin Cpn60                                      |
|                                    |                | IPR002194 | Chaperonin TCP-1, conserved site                      |
|                                    |                | IPR002423 | Chaperonin Cpn60/TCP-1                                |
|                                    |                | IPR008950 | GroEL-like chaperone, ATPase                          |
|                                    |                | IPR012716 | T-complex protein 1, beta subunit                     |
| CG8977                             | Tcp1-<br>gamma | IPR001844 | Chaperonin Cpn60                                      |
|                                    |                | IPR002194 | Chaperonin TCP-1, conserved site                      |
|                                    |                | IPR002423 | Chaperonin Cpn60/TCP-1                                |
|                                    |                | IPR008950 | GroEL-like chaperone, ATPase                          |
|                                    |                | IPR012719 | T-complex protein 1, gamma subunit                    |
| CG5525                             | Tcp1-delta     | IPR001844 | Chaperonin Cpn60                                      |
|                                    |                | IPR002194 | Chaperonin TCP-1, conserved site                      |
|                                    |                | IPR002423 | Chaperonin Cpn60/TCP-1                                |

|         |              |           |                                            |
|---------|--------------|-----------|--------------------------------------------|
|         |              | IPR008950 | GroEL-like chaperone, ATPase               |
|         |              | IPR012717 | T-complex protein 1, delta subunit         |
| CG8439  | Tcp1-epsilon | IPR001844 | Chaperonin Cpn60                           |
|         |              | IPR002194 | Chaperonin TCP-1, conserved site           |
|         |              | IPR002423 | Chaperonin Cpn60/TCP-1                     |
|         |              | IPR008950 | GroEL-like chaperone, ATPase               |
|         |              | IPR012718 | T-complex protein 1, epsilon subunit       |
| CG8231  | Tcp1-zeta    | IPR001844 | Chaperonin Cpn60                           |
|         |              | IPR002194 | Chaperonin TCP-1, conserved site           |
|         |              | IPR002423 | Chaperonin Cpn60/TCP-1                     |
|         |              | IPR008950 | GroEL-like chaperone, ATPase               |
|         |              | IPR012722 | T-complex protein 1, zeta subunit          |
| CG8351  | Tcp1-eta     | IPR000719 | Protein kinase, core                       |
|         |              | IPR001844 | Chaperonin Cpn60                           |
|         |              | IPR002194 | Chaperonin TCP-1, conserved site           |
|         |              | IPR002423 | Chaperonin Cpn60/TCP-1                     |
|         |              | IPR008950 | GroEL-like chaperone, ATPase               |
|         |              | IPR012720 | T-complex protein 1, eta subunit           |
|         |              | IPR017441 | Protein kinase ATP binding, conserved site |
| CG8258  | Tcp1-theta   | IPR001844 | Chaperonin Cpn60                           |
|         |              | IPR002194 | Chaperonin TCP-1, conserved site           |
|         |              | IPR002423 | Chaperonin Cpn60/TCP-1                     |
|         |              | IPR008950 | GroEL-like chaperone, ATPase               |
|         |              | IPR012721 | T-complex protein 1, theta subunit         |
| CG12101 | Hsp-60       | IPR001844 | Chaperonin Cpn60                           |
|         |              | IPR002423 | Chaperonin Cpn60/TCP-1                     |
|         |              | IPR008950 | GroEL-like chaperone, ATPase               |
|         |              | IPR012723 | Chaperonin GroEL                           |



|                                        |                  |           |                                                     |
|----------------------------------------|------------------|-----------|-----------------------------------------------------|
| 14-3-3 DOMAIN (IPR000308)              |                  |           |                                                     |
| CG31196                                | 14-3-3-epsilon   | IPR000308 | 14-3-3 protein                                      |
| CG17870                                | 14-3-3-zeta      | IPR000308 | 14-3-3 protein                                      |
| REPLICATION FACTOR COMPLEX (IPR013748) |                  |           |                                                     |
| CG14999                                | Rfc 40kD subunit | IPR003593 | AAA+ ATPase, core                                   |
|                                        |                  | IPR008921 | DNA polymerase III clamp loader subunit, C-terminal |
|                                        |                  | IPR013748 | Replication factor C                                |
| CG5313                                 | Rfc 3            | IPR003593 | AAA+ ATPase, core                                   |
|                                        |                  | IPR003959 | AAA ATPase, core                                    |
|                                        |                  | IPR008921 | DNA polymerase III clamp loader subunit, C-terminal |
|                                        |                  | IPR013748 | Replication factor C                                |
| CG8142                                 | Rfc4             | IPR003593 | AAA+ ATPase, core                                   |
|                                        |                  | IPR003959 | AAA ATPase, core                                    |
|                                        |                  | IPR008921 | DNA polymerase III clamp loader subunit, C-terminal |
|                                        |                  | IPR013748 | Replication factor C                                |
| CG1119                                 | Rfc 140          | IPR001357 | BRCT                                                |
|                                        |                  | IPR003593 | AAA+ ATPase, core                                   |
|                                        |                  | IPR003959 | AAA ATPase, core                                    |
|                                        |                  | IPR012178 | DNA replication factor C, large subunit             |
|                                        |                  | IPR013725 | DNA replication factor RFC1, C-terminal             |
|                                        |                  | IPR008921 | DNA polymerase III clamp loader subunit, C-terminal |
| CG6258                                 | Rfc 38kD subunit | IPR003593 | AAA+ ATPase, core                                   |
|                                        |                  | IPR008921 | DNA polymerase III clamp loader subunit, C-terminal |
|                                        |                  | IPR013748 | Replication factor C                                |
| ISOCYTRATE DEHYDROGENASE (IPR001804)   |                  |           |                                                     |

|                             |                                     |           |                                                       |
|-----------------------------|-------------------------------------|-----------|-------------------------------------------------------|
| CG5028                      |                                     | IPR001804 | Isocitrate/isopropylmalate dehydrogenase              |
|                             |                                     | IPR004434 | Isocitrate dehydrogenase NAD-dependent, mitochondrial |
| CG6439                      | Isocitrate Dehydrogenase            | IPR001804 | Isocitrate/isopropylmalate dehydrogenase              |
|                             |                                     | IPR004434 | Isocitrate dehydrogenase NAD-dependent, mitochondrial |
| CG32026                     |                                     | IPR001804 | Isocitrate/isopropylmalate dehydrogenase              |
| LIPID TRANSPORT (IPR001747) |                                     |           |                                                       |
| CG15828                     |                                     | IPR001747 | Lipid transport protein, N-terminal                   |
|                             |                                     | IPR001846 | von Willebrand factor, type D                         |
|                             |                                     | IPR009454 | Lipid transport, open beta-sheet                      |
|                             |                                     | IPR011030 | Vitellinogen, superhelical                            |
|                             |                                     | IPR015816 | Vitellinogen, beta-sheet N-terminal                   |
|                             |                                     | IPR015817 | Vitellinogen, open beta-sheet, subdomain 1            |
|                             |                                     | IPR015819 | Lipid transport protein, beta-sheet shell             |
|                             |                                     | IPR014853 | Region of Unknown Function DUF1787                    |
|                             |                                     | IPR015255 | Vitellinogen, open beta-sheet                         |
| CG11064                     | Retinoid Fatty Acid Binding Protein | IPR015817 | Vitellinogen, open beta-sheet, subdomain 1            |
|                             |                                     | IPR015819 | Lipid transport protein, beta-sheet shell             |
|                             |                                     | IPR001747 | Lipid transport protein, N-terminal                   |
|                             |                                     | IPR001846 | von Willebrand factor, type D                         |
|                             |                                     | IPR009454 | Lipid transport, open beta-sheet                      |
|                             |                                     | IPR011030 | Vitellinogen, superhelical                            |
|                             |                                     | IPR015255 | Vitellinogen, open beta-sheet                         |
| THIOLASE (IPR002155)        |                                     |           |                                                       |
| CG10932                     |                                     | IPR002155 | Thiolase                                              |
|                             |                                     | IPR016038 | Thiolase-like, subgroup                               |
|                             |                                     | IPR016039 | Thiolase-like                                         |
| CG4581                      | Thiolase                            | IPR002155 | Thiolase                                              |

|                                   |                                       |           |                                                          |
|-----------------------------------|---------------------------------------|-----------|----------------------------------------------------------|
|                                   |                                       | IPR016038 | Thiolase-like, subgroup                                  |
|                                   |                                       | IPR016039 | Thiolase-like                                            |
| CG4600                            | yippee interacting protein 2          | IPR002155 | Thiolase                                                 |
|                                   |                                       | IPR016039 | Thiolase-like                                            |
|                                   |                                       | IPR016038 | Thiolase-like, subgroup                                  |
| IMMUNOGLOBULIN DOMAIN (IPR013098) |                                       |           |                                                          |
| CG18242/                          | D-Titin                               | IPR001452 | Src homology-3                                           |
| CG1915                            |                                       | IPR003598 | Immunoglobulin subtype 2                                 |
|                                   |                                       | IPR003599 | Immunoglobulin subtype                                   |
|                                   |                                       | IPR003961 | Fibronectin, type III                                    |
|                                   |                                       | IPR007110 | Immunoglobulin-like                                      |
|                                   |                                       | IPR008957 | Fibronectin, type III-like fold                          |
|                                   |                                       | IPR010939 | Protein of Unknown function DUF1136                      |
|                                   |                                       | IPR013098 | Immunoglobulin I-set                                     |
|                                   |                                       | IPR013151 | Immunoglobulin                                           |
|                                   |                                       | IPR013026 | Tetratricopeptide region                                 |
|                                   |                                       | IPR013783 | Immunoglobulin-like fold                                 |
|                                   |                                       | IPR000219 | Dbl homology (DH) domain                                 |
| CG10443                           | Leukocyte-antigen-related-like/Ptp38A | IPR000242 | Protein-tyrosine phosphatase, receptor/non-receptor type |
|                                   |                                       | IPR000387 | Protein-tyrosine phosphatase                             |
|                                   |                                       | IPR003598 | Immunoglobulin subtype 2                                 |
|                                   |                                       | IPR003961 | Fibronectin, type III                                    |
|                                   |                                       | IPR003962 | Fibronectin, type III subdomain                          |
|                                   |                                       | IPR007110 | Immunoglobulin-like                                      |
|                                   |                                       | IPR008957 | Fibronectin, type III-like fold                          |
|                                   |                                       | IPR013098 | Immunoglobulin I-set                                     |
|                                   |                                       | IPR013151 | Immunoglobulin                                           |
|                                   |                                       | IPR013783 | Immunoglobulin-like fold                                 |
|                                   |                                       | IPR016130 | Protein-tyrosine phosphatase, active site                |

|                                                |                                  |           |                                                                |
|------------------------------------------------|----------------------------------|-----------|----------------------------------------------------------------|
| RNAPol Rbp3/11 DIMERISATION DOMAIN (IPR011261) |                                  |           |                                                                |
| CG3756                                         |                                  | IPR009025 | DNA-directed RNA polymerase, RBP11-like                        |
|                                                |                                  | IPR011261 | DNA-directed RNA polymerase, dimerisation                      |
|                                                |                                  | IPR011262 | DNA-directed RNA polymerase, insert                            |
|                                                |                                  | IPR011263 | DNA-directed RNA polymerase, RpoA/D/Rpb3-type                  |
| CG7885                                         | RNA Pol II 33kD subunit          | IPR001514 | DNA-directed RNA polymerase, 30-40 kDa subunit, conserved site |
|                                                |                                  | IPR009025 | DNA-directed RNA polymerase, RBP11-like                        |
|                                                |                                  | IPR011261 | DNA-directed RNA polymerase, dimerisation                      |
|                                                |                                  | IPR011263 | DNA-directed RNA polymerase, RpoA/D/Rpb3-type                  |
| RNA SYNTHETASE (IPR004364, IPR004365)          |                                  |           |                                                                |
| CG12141                                        | Lysyl-tRNA synthetase (Aats-Lys) | IPR002313 | Lysyl-tRNA synthetase, class II                                |
|                                                |                                  | IPR004364 | Aminoacyl-tRNA synthetase, class II (D, K and N)               |
|                                                |                                  | IPR004365 | Nucleic acid binding, OB-fold, tRNA/helicase-type              |
|                                                |                                  | IPR006195 | Aminoacyl-tRNA synthetase, class II                            |
|                                                |                                  | IPR012340 | Nucleic acid-binding, OB-fold                                  |
|                                                |                                  | IPR016027 | Nucleic acid-binding, OB-fold-like                             |
| CG3821                                         | Aspartyl-tRNA synthetase         | IPR002312 | Aspartyl-tRNA synthetase, class IIb                            |
|                                                |                                  | IPR004364 | Aminoacyl-tRNA synthetase, class II (D, K and N)               |
|                                                |                                  | IPR004365 | Nucleic acid binding, OB-fold, tRNA/helicase-type              |
|                                                |                                  | IPR004523 | Aspartyl-tRNA synthetase, class IIb, archaea/euk type          |
|                                                |                                  | IPR006195 | Aminoacyl-tRNA synthetase, class II                            |
|                                                |                                  | IPR012340 | Nucleic acid-binding, OB-fold                                  |
|                                                |                                  | IPR016027 | Nucleic acid-binding, OB-fold-like                             |
| CYCLOPHILIN (IPR002130)                        |                                  |           |                                                                |
| CG2852                                         |                                  | IPR002130 | Peptidyl-prolyl cis-trans isomerase, cyclophilin-type          |
|                                                |                                  | IPR015891 | Cyclophilin-like                                               |
| CG9916                                         | Cyclophilin 1                    | IPR002130 | Peptidyl-prolyl cis-trans isomerase, cyclophilin-type          |

|                          |               |           |                                     |
|--------------------------|---------------|-----------|-------------------------------------|
|                          |               | IPR015891 | Cyclophilin-like                    |
| TIP49 DOMAIN (IPR010339) |               |           |                                     |
| CG9750                   | Reptin        | IPR003593 | AAA+ ATPase, core                   |
|                          |               | IPR010339 | TIP49, C-terminal                   |
| CG4003                   | Pontin        | IPR003593 | AAA+ ATPase, core                   |
|                          |               | IPR003959 | AAA ATPase, core                    |
|                          |               | IPR010339 | TIP49, C-terminal                   |
| UNKNOWN/MULTIPLE DOMAINS |               |           |                                     |
| CG5792                   |               | IPR010916 | TonB box, conserved site            |
|                          |               | IPR012981 | Nop17p                              |
| CG5787                   |               | IPR009502 | Secretion monitor precursor protein |
| CG6450                   | Lava Lamp     | IPR009053 | Prefoldin                           |
| CG10212                  | SMC2          | IPR003395 | RecF/RecN/SMC protein, N-terminal   |
|                          |               | IPR003439 | ABC transporter-like                |
|                          |               | IPR010935 | SMCs flexible hinge                 |
| CG6944                   | Lamin         | IPR001322 | Intermediate filament, C-terminal   |
|                          |               | IPR001664 | Intermediate filament protein       |
|                          |               | IPR016044 | Filament                            |
| CG12819                  | Slender Lobes | IPR009477 | Protein of Unknown Function DUF1098 |
| CG34417                  |               | IPR001715 | Calponin-like actin-binding         |
|                          |               | IPR004829 | Cell surface antigen                |
|                          |               | IPR016146 | Calponin-homology                   |
| CG6384                   | CP190         | IPR000210 | BTB/POZ-like                        |

|        |        |           |                                            |
|--------|--------|-----------|--------------------------------------------|
|        |        | IPR000210 | BTB/POZ-like                               |
|        |        | IPR000886 | Endoplasmic reticulum, targeting sequence  |
|        |        | IPR007087 | Zinc finger, C2H2-type                     |
|        |        | IPR013069 | BTB/POZ                                    |
|        |        | IPR011333 | BTB/POZ fold                               |
|        |        | IPR015880 | Zinc finger, C2H2-like                     |
| CG3696 | Kismet | IPR000330 | SNF2-related                               |
|        |        | IPR000953 | Chromo domain                              |
|        |        | IPR001650 | DNA/RNA helicase, C-terminal               |
|        |        | IPR006576 | BRK                                        |
|        |        | IPR014001 | DEAD-like helicase, N-terminal             |
|        |        | IPR014021 | Helicase, superfamily 1 and 2, ATP-binding |
|        |        | IPR016197 | Chromo domain-like                         |
| CG9765 | D-TACC | IPR007707 | Transforming acidic coiled-coil-containing |
